# Supplementary material for: Molecular Cloning, Expression Analysis, and Functional Analysis of Nine IbSWEETs in Ipomoea batatas (L.) Lam
Source: MDPI journal article supplement (doi:10.3390/ijms242316615), 2023-11-22
Supplement: s1 [file s1]

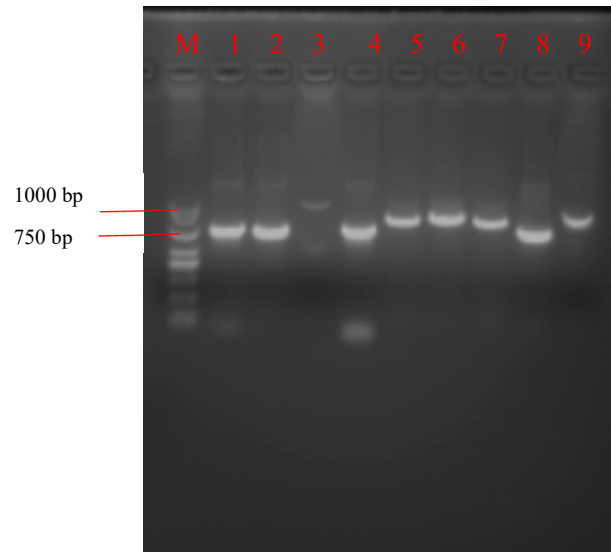

Figure S1. Agarose gel diagram of *SWEET* genes PCR amplification results. M: marker 2000bp; 1-9 were the PCR results of *IbSWEET1a*, *1b*, *2*, *7*, *10a*, *10c*, *12*, *15*, and *17*, respectively.

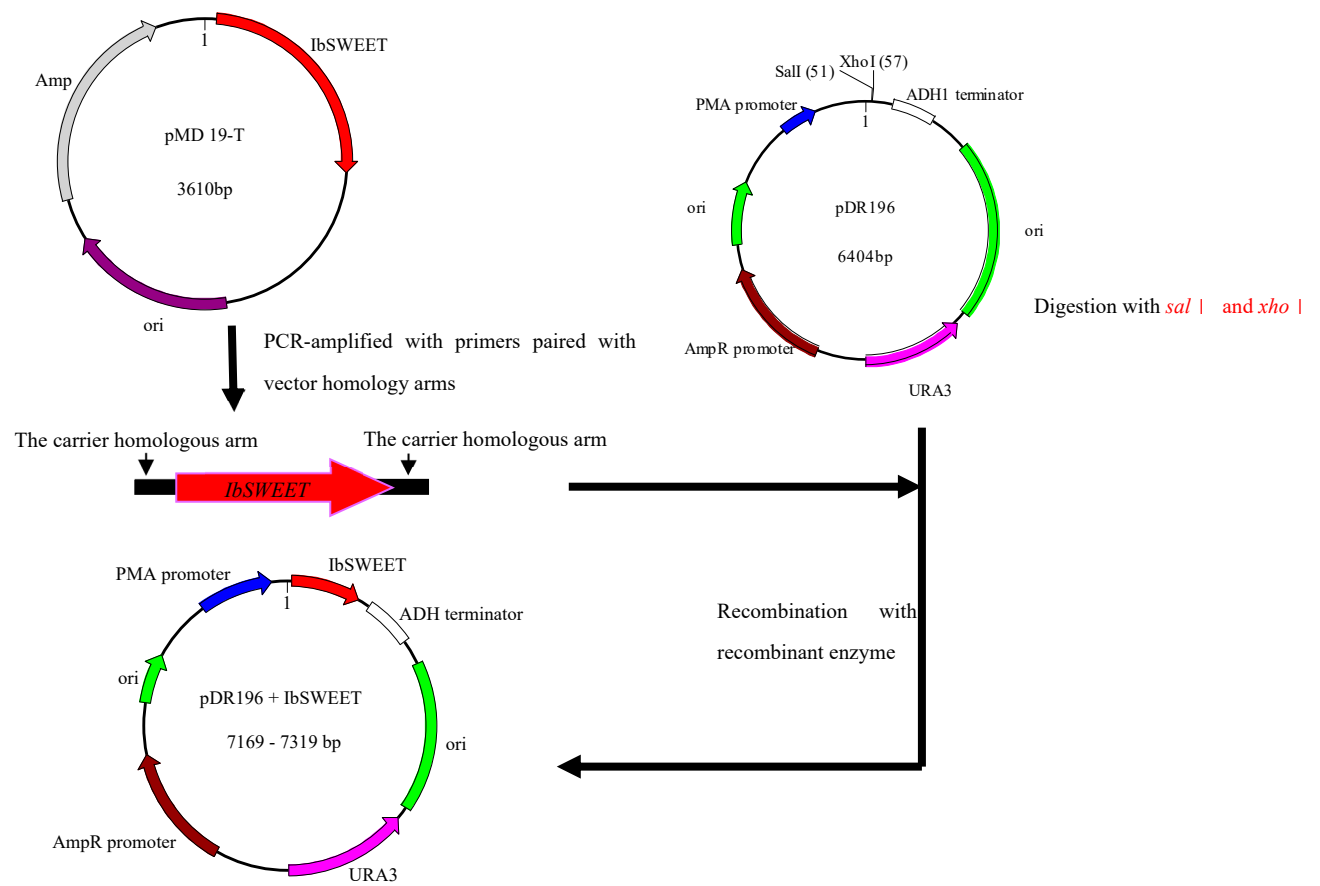

Figure S2. Construction of *IbSWEETs* expression vector.
